# Supplementary material for: Evidence for Lignocellulose-Decomposing Enzymes in the Genome and Transcriptome of the Aquatic Hyphomycete Clavariopsis aquatica
Source: MDPI journal article supplement (doi:10.3390/jof7100854), 2021-10-12
Supplement: s1 [file s1]

## Supplemental Info S1: Commands

**Digital normalization** was done with the khmer package with the following steps and parameters:

1. `interleave-reads.py`
2. `normalize-by-median.py -C 20 -k 20 -N 4 -x 2.5e8`
3. `filter-abund.py clavariopsis.kh`
4. `normalize-by-median.py -C 5 -k 20 -N 4 -x 1e8`
5. `extract-paired-reads.py`

**Genome assembly** was done with velvet with the digitally normalized reads with the following commands:

1. `velveth -fastq.gz -shortPaired`
2. `velvetg -ins_length 900 -exp_cov 140 -cov_cutoff 50`

**De Novo transcriptome assembly** was done with Trinity with the following command:

`Trinity --seqType fq --max_memory 100G --single $INDATA --CPU 12 --trimmomatic --normalize_reads --SS_lib_type R`

**Genome guided transcriptome assembly** was done with Trinity with the following command:

`Trinity --genome_guided_bam $INDATA --genome_guided_max_intron 1000 --max_memory 30G --CPU 12`

The **PASA pipeline** was run with the following commands:

1. `cat Trinity.fasta Trinity-GG.fasta > ${TRANSCRIPTS}`
2. `accession_extractor.pl < Trinity.fasta > tdn.accs`
3. `Launch_PASA_pipeline.pl -c alignAssembly.conf -C -R -g ${GENOME} -t ${TRANSCRIPTS} --ALIGNERS blat,gmap --TDN tdn.accs --transcribed_is_aligned_orient --MAX_INTRON_LENGTH 3000`
4. `build_comprehensive_transcriptome.dbi -c alignAssembly.conf -t ${TRANSCRIPTS} --min_per_ID 95 --min_per_aligned 30`

## Supplemental Table S1

**Supplemental Table S1A: CAZy families predicted to be active by MGSA analysis. For comparison growth on straw compared to growth on malt extract**

| condition  | CAZy Family | activity                                                                                                                                                                                                                                                                                                                                                                                                                                                                                                                                                                                                                                                                                                     | genes with this annotation in the genome | differentially expressed genes with this annotation | activation probability |
|------------|-------------|--------------------------------------------------------------------------------------------------------------------------------------------------------------------------------------------------------------------------------------------------------------------------------------------------------------------------------------------------------------------------------------------------------------------------------------------------------------------------------------------------------------------------------------------------------------------------------------------------------------------------------------------------------------------------------------------------------------|------------------------------------------|-----------------------------------------------------|------------------------|
| straw-malt | AA9         | AA9 (formerly GH61) proteins are copper-dependent lytic polysaccharide monooxygenases (LPMOs); cleavage of cellulose chains with oxidation of various carbons (C-1, C-4 and C-6) has been reported several times in the literature;                                                                                                                                                                                                                                                                                                                                                                                                                                                                          | 49                                       | 35                                                  | 1                      |
| straw-malt | CE1         | acetyl xylan esterase; cinnamoyl esterase; feruloyl esterase; carboxylesterase; S-formylglutathione hydrolase; diacylglycerol O-acyltransferase; trehalose 6-O-mycolyltransferase                                                                                                                                                                                                                                                                                                                                                                                                                                                                                                                            | 10                                       | 9                                                   | 0.9882                 |
| straw-malt | GH11        | endo- $\beta$ -1,4-xylanase; endo- $\beta$ -1,3-xylanase                                                                                                                                                                                                                                                                                                                                                                                                                                                                                                                                                                                                                                                     | 6                                        | 6                                                   | 0.96                   |
| straw-malt | GH7         | endo- $\beta$ -1,4-glucanase; reducing end-acting cellobiohydrolase; chitosanase; endo- $\beta$ -1,3-1,4-glucanase                                                                                                                                                                                                                                                                                                                                                                                                                                                                                                                                                                                           | 7                                        | 6                                                   | 0.877                  |
| straw-malt | GH10        | endo-1,4- $\beta$ -xylanase; endo-1,3- $\beta$ -xylanase; tomatinase; xylan endotransglycosylase                                                                                                                                                                                                                                                                                                                                                                                                                                                                                                                                                                                                             | 4                                        | 4                                                   | 0.7582                 |
| straw-malt | GH5_5       | endo- $\beta$ -1,4-glucanase / cellulase; endo- $\beta$ -1,4-xylanase; $\beta$ -glucosidase; $\beta$ -mannosidase; $\beta$ -glucosylceramidase; glucan $\beta$ -1,3-glucosidase; licheninase; exo- $\beta$ -1,4-glucanase / cellodextrinase; glucan endo-1,6- $\beta$ -glucosidase; mannan endo- $\beta$ -1,4-mannosidase; cellulose $\beta$ -1,4-cellobiosidase; steryl $\beta$ -glucosidase; endoglycoceramidase; chitosanase; $\beta$ -primeverosidase; xyloglucan-specific endo- $\beta$ -1,4-glucanase; endo- $\beta$ -1,6-galactanase; hesperidin 6-O- $\alpha$ -L-rhamnosyl- $\beta$ -glucosidase; $\beta$ -1,3-mannanase; arabinoxylan-specific endo- $\beta$ -1,4-xylanase; mannan transglycosylase | 5                                        | 5                                                   | 0.6948                 |

**Supplemental Table S1B: KEGG pathways predicted to be active by MGSA analysis. For comparison growth on straw compared to growth**

**on malt extract, and growth on alder compared to malt extract**

| condition  | KEGG pathway ID | KEGG pathway name                            | genes with this annotation in the genome | differentially expressed genes with this annotation | activation probability |
|------------|-----------------|----------------------------------------------|------------------------------------------|-----------------------------------------------------|------------------------|
| alder-malt | ko00040         | Pentose and glucuronate interconversions     | 35                                       | 19                                                  | 1                      |
| alder-malt | ko01120         | Microbial metabolism in diverse environments | 246                                      | 92                                                  | 1                      |
| alder-malt | ko04146         | Peroxisome                                   | 54                                       | 35                                                  | 1                      |
| alder-malt | ko00280         | Valine, leucine and isoleucine degradation   | 49                                       | 26                                                  | 1                      |
| alder-malt | ko00640         | Propanoate metabolism                        | 28                                       | 12                                                  | 0.9992                 |
| alder-malt | ko00460         | Cyanoamino acid metabolism                   | 26                                       | 13                                                  | 0.9868                 |
| alder-malt | ko00906         | Carotenoid biosynthesis                      | 4                                        | 4                                                   | 0.9804                 |
| alder-malt | ko04978         | Mineral absorption                           | 7                                        | 4                                                   | 0.9438                 |
| alder-malt | ko00052         | Galactose metabolism                         | 30                                       | 12                                                  | 0.7968                 |
| alder-malt | ko04920         | Adipocytokine signaling pathway              | 9                                        | 4                                                   | 0.6656                 |
| alder-malt | ko04260         | Cardiac muscle contraction                   | 12                                       | 4                                                   | 0.6062                 |
| straw-malt | ko00500         | Starch and sucrose metabolism                | 65                                       | 31                                                  | 1                      |
| straw-malt | ko00040         | Pentose and glucuronate interconversions     | 35                                       | 19                                                  | 1                      |
| straw-malt | ko03008         | Ribosome biogenesis in eukaryotes            | 64                                       | 23                                                  | 1                      |
| straw-malt | ko00330         | Arginine and proline metabolism              | 38                                       | 18                                                  | 0.9978                 |
| straw-malt | ko00520         | Amino sugar and nucleotide sugar metabolism  | 49                                       | 17                                                  | 0.967                  |
| straw-malt | ko00980         | Metabolism of xenobiotics by cytochrome P450 | 28                                       | 14                                                  | 0.9512                 |
| straw-malt | ko00630         | Glyoxylate and dicarboxylate metabolism      | 40                                       | 21                                                  | 0.9136                 |
| straw-malt | ko00920         | Sulfur metabolism                            | 17                                       | 8                                                   | 0.9056                 |
| straw-malt | ko00052         | Galactose metabolism                         | 30                                       | 15                                                  | 0.897                  |
| straw-malt | ko00350         | Tyrosine metabolism                          | 50                                       | 20                                                  | 0.838                  |
| straw-malt | ko00770         | Pantothenate and CoA biosynthesis            | 23                                       | 11                                                  | 0.7994                 |
| straw-malt | ko00910         | Nitrogen metabolism                          | 21                                       | 9                                                   | 0.6518                 |
| straw-malt | ko01220         | Degradation of aromatic compounds            | 32                                       | 17                                                  | 0.6144                 |

**Supplemental Table S1C: GO terms predicted to be active by MGSA analysis. For comparison growth on straw compared to growth on malt extract, and growth on alder compared to malt extract**

| condition  | GO ID      | GO name                                                                        | genes with this<br>annotation in the<br>genome | differentially<br>expressed genes<br>with this annotation | activation<br>probability |
|------------|------------|--------------------------------------------------------------------------------|------------------------------------------------|-----------------------------------------------------------|---------------------------|
| alder-malt | GO:0016491 | oxidoreductase activity                                                        | 506                                            | 205                                                       | 1                         |
| alder-malt | GO:0005975 | carbohydrate metabolic process                                                 | 226                                            | 72                                                        | 1                         |
| alder-malt | GO:0071949 | FAD binding                                                                    | 55                                             | 29                                                        | 1                         |
| alder-malt | GO:0055085 | transmembrane transport                                                        | 513                                            | 165                                                       | 1                         |
| alder-malt | GO:0055114 | oxidation-reduction process                                                    | 768                                            | 283                                                       | 1                         |
| alder-malt | GO:0008152 | metabolic process                                                              | 387                                            | 158                                                       | 1                         |
| alder-malt | GO:0008080 | N-acetyltransferase activity                                                   | 49                                             | 19                                                        | 0.9998                    |
| alder-malt | GO:0006508 | proteolysis                                                                    | 132                                            | 39                                                        | 0.7976                    |
| straw-malt | GO:0008080 | N-acetyltransferase activity                                                   | 49                                             | 22                                                        | 1                         |
| straw-malt | GO:0016491 | oxidoreductase activity                                                        | 506                                            | 192                                                       | 1                         |
| straw-malt | GO:0005975 | carbohydrate metabolic process                                                 | 226                                            | 117                                                       | 1                         |
| straw-malt | GO:0003824 | catalytic activity                                                             | 610                                            | 198                                                       | 1                         |
| straw-malt | GO:0016787 | hydrolase activity                                                             | 165                                            | 54                                                        | 1                         |
| straw-malt | GO:0071949 | FAD binding                                                                    | 55                                             | 31                                                        | 1                         |
| straw-malt | GO:0006508 | proteolysis                                                                    | 132                                            | 53                                                        | 1                         |
| straw-malt | GO:0055085 | transmembrane transport                                                        | 513                                            | 188                                                       | 1                         |
| straw-malt | GO:0055114 | oxidation-reduction process                                                    | 768                                            | 279                                                       | 1                         |
| straw-malt | GO:0000981 | RNA polymerase II transcription factor activity, sequence-specific DNA binding | 217                                            | 66                                                        | 0.9982                    |
| straw-malt | GO:0042254 | ribosome biogenesis                                                            | 15                                             | 9                                                         | 0.634                     |

## Supplemental Table S2

| condition   | CAZy Family | activity                                                                                                                                                                                                                                                                                                                                                                                                                                                                                                                                                                                                                                                                                    | genes with this annotation in the genome | differentially expressed genes with this annotation | activation probability |
|-------------|-------------|---------------------------------------------------------------------------------------------------------------------------------------------------------------------------------------------------------------------------------------------------------------------------------------------------------------------------------------------------------------------------------------------------------------------------------------------------------------------------------------------------------------------------------------------------------------------------------------------------------------------------------------------------------------------------------------------|------------------------------------------|-----------------------------------------------------|------------------------|
| alder-straw | AA9         | AA9 (formerly GH61) proteins are copper-dependent lytic polysaccharide monooxygenases (LPMOs); cleavage of cellulose chains with oxidation of various carbons (C-1, C-4 and C-6) has been reported several times in the literature;                                                                                                                                                                                                                                                                                                                                                                                                                                                         | 49                                       | 35                                                  | 1                      |
| alder-straw | CE1         | acetyl xylan esterase; cinnamoyl esterase; feruloyl esterase; carboxylesterase; S-formylglutathione hydrolase; diacylglycerol O-acyltransferase; trehalose 6-O-mycolyltransferase                                                                                                                                                                                                                                                                                                                                                                                                                                                                                                           | 10                                       | 9                                                   | 0.9826                 |
| alder-straw | GH11        | endo- $\beta$ -1,4-xylanase; endo- $\beta$ -1,3-xylanase                                                                                                                                                                                                                                                                                                                                                                                                                                                                                                                                                                                                                                    | 6                                        | 6                                                   | 0.935                  |
| alder-straw | GH7         | endo- $\beta$ -1,4-glucanase; reducing end-acting cellobiohydrolase; chitosanase; endo- $\beta$ -1,3-1,4-glucanase                                                                                                                                                                                                                                                                                                                                                                                                                                                                                                                                                                          | 7                                        | 6                                                   | 0.8518                 |
| alder-straw | GH131       | broad specificity exo- $\beta$ -1,3/1,6-glucanase with endo- $\beta$ -1,4-glucanase activity;                                                                                                                                                                                                                                                                                                                                                                                                                                                                                                                                                                                               | 4                                        | 4                                                   | 0.7446                 |
| alder-straw | GH10        | endo-1,4- $\beta$ -xylanase; endo-1,3- $\beta$ -xylanase; tomatinase; xylan endotransglycosylase                                                                                                                                                                                                                                                                                                                                                                                                                                                                                                                                                                                            | 4                                        | 4                                                   | 0.7428                 |
| alder-straw | GH5_5       | endo- $\beta$ -1,4-glucanase / cellulase; endo- $\beta$ -1,4-xylanase; $\beta$ -glucosidase; $\beta$ -mannosidase; $\beta$ -glucosylceramidase; glucan $\beta$ -1,3-glucosidase; licheninase; exo- $\beta$ -1,4-glucanase / cellodextrinase; glucan endo-1,6- $\beta$ -glucosidase; mannan endo- $\beta$ -1,4-mannosidase; cellulose $\beta$ -1,4-cellobiosidase; steryl $\beta$ -glucosidase; endoglycoceramidase; chitosanase; $\beta$ -primeverosidase; xyloglucan-specific endo- $\beta$ -1,4-glucanase; endo- $\beta$ -1,6-galactanase; hesperidin 6-O- $\alpha$ -L-rhamnosyl- $\beta$ -glucosidase; $\beta$ -1,3-mannanase; arabinoxylan-specific endo- $\beta$ -1,4-xylanase; mannan | 5                                        | 5                                                   | 0.6984                 |

|                 |      |                                                                                                                                                                                                                                                                                                                                                                                   |    |    |        |
|-----------------|------|-----------------------------------------------------------------------------------------------------------------------------------------------------------------------------------------------------------------------------------------------------------------------------------------------------------------------------------------------------------------------------------|----|----|--------|
|                 |      | transglycosylase                                                                                                                                                                                                                                                                                                                                                                  |    |    |        |
| solid-liquidExp | GH7  | endo- $\beta$ -1,4-glucanase; reducing end-acting cellobiohydrolase; chitosanase; endo- $\beta$ -1,3-1,4-glucanase                                                                                                                                                                                                                                                                | 7  | 7  | 0.937  |
| solid-liquidExp | AA9  | AA9 (formerly GH61) proteins are copper-dependent lytic polysaccharide monooxygenases (LPMOs); cleavage of cellulose chains with oxidation of various carbons (C-1, C-4 and C-6) has been reported several times in the literature;                                                                                                                                               | 49 | 26 | 0.813  |
| solid-liquidExp | GH72 | $\beta$ -1,3-glucanosyltransglycosylase                                                                                                                                                                                                                                                                                                                                           | 7  | 6  | 0.7628 |
| solid-liquidExp | AA7  | glucooligosaccharide oxidase; chitoooligosaccharide oxidase                                                                                                                                                                                                                                                                                                                       | 25 | 14 | 0.6684 |
| solid-liquidExp | GH3  | $\beta$ -glucosidase; xylan 1,4- $\beta$ -xylosidase; $\beta$ -glucosylceramidase; $\beta$ -N-acetylhexosaminidase; $\alpha$ -L-arabinofuranosidase; glucan 1,3- $\beta$ -glucosidase; glucan 1,4- $\beta$ -glucosidase; isoprimeverose-producing oligoxyloglucan hydrolase; coniferin $\beta$ -glucosidase; exo-1,3-1,4-glucanase; $\beta$ -N-acetylglucosaminide phosphorylases | 19 | 11 | 0.6038 |
| solid-liquidSta | AA9  | AA9 (formerly GH61) proteins are copper-dependent lytic polysaccharide monooxygenases (LPMOs); cleavage of cellulose chains with oxidation of various carbons (C-1, C-4 and C-6) has been reported several times in the literature;                                                                                                                                               | 49 | 33 | 1      |
| solid-liquidSta | GH7  | endo- $\beta$ -1,4-glucanase; reducing end-acting cellobiohydrolase; chitosanase; endo- $\beta$ -1,3-1,4-glucanase                                                                                                                                                                                                                                                                | 7  | 7  | 0.9634 |
| solid-liquidSta | CE16 | acetyl esterase active on various carbohydrate acetyl esters                                                                                                                                                                                                                                                                                                                      | 5  | 5  | 0.847  |
| solid-liquidSta | AA12 | The pyrroloquinoline quinone-dependent oxidoreductase activity was demonstrated for the                                                                                                                                                                                                                                                                                           | 6  | 5  | 0.745  |

|                 |       |                                                                                                                                                                                                                                                                                                                                                                                                                                                                                                                                                                                                                                                                                             |    |    |        |
|-----------------|-------|---------------------------------------------------------------------------------------------------------------------------------------------------------------------------------------------------------------------------------------------------------------------------------------------------------------------------------------------------------------------------------------------------------------------------------------------------------------------------------------------------------------------------------------------------------------------------------------------------------------------------------------------------------------------------------------------|----|----|--------|
|                 |       | CC1G_09525 protein of Coprinopsis cinerea.                                                                                                                                                                                                                                                                                                                                                                                                                                                                                                                                                                                                                                                  |    |    |        |
| solid-liquidSta | GH55  | exo- $\beta$ -1,3-glucanase; endo- $\beta$ -1,3-glucanase                                                                                                                                                                                                                                                                                                                                                                                                                                                                                                                                                                                                                                   | 4  | 4  | 0.7364 |
| solid-liquidSta | GH11  | endo- $\beta$ -1,4-xylanase; endo- $\beta$ -1,3-xylanase                                                                                                                                                                                                                                                                                                                                                                                                                                                                                                                                                                                                                                    | 6  | 5  | 0.7024 |
| stat-exp        | CE8   | pectin methylesterase                                                                                                                                                                                                                                                                                                                                                                                                                                                                                                                                                                                                                                                                       | 6  | 5  | 0.6276 |
| straw-malt      | AA9   | AA9 (formerly GH61) proteins are copper-dependent lytic polysaccharide monooxygenases (LPMOs); cleavage of cellulose chains with oxidation of various carbons (C-1, C-4 and C-6) has been reported several times in the literature;                                                                                                                                                                                                                                                                                                                                                                                                                                                         | 49 | 35 | 1      |
| straw-malt      | CE1   | acetyl xylan esterase; cinnamoyl esterase; feruloyl esterase; carboxylesterase; S-formylglutathione hydrolase; diacylglycerol O-acyltransferase; trehalose 6-O-mycolyltransferase                                                                                                                                                                                                                                                                                                                                                                                                                                                                                                           | 10 | 9  | 0.9882 |
| straw-malt      | GH11  | endo- $\beta$ -1,4-xylanase; endo- $\beta$ -1,3-xylanase                                                                                                                                                                                                                                                                                                                                                                                                                                                                                                                                                                                                                                    | 6  | 6  | 0.96   |
| straw-malt      | GH7   | endo- $\beta$ -1,4-glucanase; reducing end-acting cellobiohydrolase; chitosanase; endo- $\beta$ -1,3-1,4-glucanase                                                                                                                                                                                                                                                                                                                                                                                                                                                                                                                                                                          | 7  | 6  | 0.877  |
| straw-malt      | GH10  | endo-1,4- $\beta$ -xylanase; endo-1,3- $\beta$ -xylanase; tomatinase; xylan endotransglycosylase                                                                                                                                                                                                                                                                                                                                                                                                                                                                                                                                                                                            | 4  | 4  | 0.7582 |
| straw-malt      | GH5_5 | endo- $\beta$ -1,4-glucanase / cellulase; endo- $\beta$ -1,4-xylanase; $\beta$ -glucosidase; $\beta$ -mannosidase; $\beta$ -glucosylceramidase; glucan $\beta$ -1,3-glucosidase; licheninase; exo- $\beta$ -1,4-glucanase / cellodextrinase; glucan endo-1,6- $\beta$ -glucosidase; mannan endo- $\beta$ -1,4-mannosidase; cellulose $\beta$ -1,4-cellobiosidase; steryl $\beta$ -glucosidase; endoglycoceramidase; chitosanase; $\beta$ -primeverosidase; xyloglucan-specific endo- $\beta$ -1,4-glucanase; endo- $\beta$ -1,6-galactanase; hesperidin 6-O- $\alpha$ -L-rhamnosyl- $\beta$ -glucosidase; $\beta$ -1,3-mannanase; arabinoxylan-specific endo- $\beta$ -1,4-xylanase; mannan | 5  | 5  | 0.6948 |

|  |  |                  |  |  |  |
|--|--|------------------|--|--|--|
|  |  | transglycosylase |  |  |  |
|--|--|------------------|--|--|--|

## Supplemental Table S3

| condition   | KEGG pathway ID | KEGG pathway name                            | genes with this annotation in the genome | differentially expressed genes with this annotation | activation probability |
|-------------|-----------------|----------------------------------------------|------------------------------------------|-----------------------------------------------------|------------------------|
| alder-malt  | ko00040         | Pentose and glucuronate interconversions     | 35                                       | 19                                                  | 1                      |
| alder-malt  | ko01120         | Microbial metabolism in diverse environments | 246                                      | 92                                                  | 1                      |
| alder-malt  | ko04146         | Peroxisome                                   | 54                                       | 35                                                  | 1                      |
| alder-malt  | ko00280         | Valine, leucine and isoleucine degradation   | 49                                       | 26                                                  | 1                      |
| alder-malt  | ko00640         | Propanoate metabolism                        | 28                                       | 12                                                  | 0.9992                 |
| alder-malt  | ko00460         | Cyanoamino acid metabolism                   | 26                                       | 13                                                  | 0.9868                 |
| alder-malt  | ko00906         | Carotenoid biosynthesis                      | 4                                        | 4                                                   | 0.9804                 |
| alder-malt  | ko04978         | Mineral absorption                           | 7                                        | 4                                                   | 0.9438                 |
| alder-malt  | ko00052         | Galactose metabolism                         | 30                                       | 12                                                  | 0.7968                 |
| alder-malt  | ko04920         | Adipocytokine signaling pathway              | 9                                        | 4                                                   | 0.6656                 |
| alder-malt  | ko04260         | Cardiac muscle contraction                   | 12                                       | 4                                                   | 0.6062                 |
| alder-straw | ko00500         | Starch and sucrose metabolism                | 65                                       | 32                                                  | 1                      |
| alder-straw | ko01120         | Microbial metabolism in diverse environments | 246                                      | 96                                                  | 1                      |
| alder-straw | ko04146         | Peroxisome                                   | 54                                       | 33                                                  | 1                      |
| alder-straw | ko00040         | Pentose and glucuronate interconversions     | 35                                       | 16                                                  | 0.9972                 |



|                 |         |                                             |     |    |        |
|-----------------|---------|---------------------------------------------|-----|----|--------|
| alder-straw     | ko00190 | Oxidative phosphorylation                   | 73  | 25 | 0.9796 |
| alder-straw     | ko00520 | Amino sugar and nucleotide sugar metabolism | 49  | 18 | 0.974  |
| alder-straw     | ko00770 | Pantothenate and CoA biosynthesis           | 23  | 10 | 0.9574 |
| alder-straw     | ko04142 | Lysosome                                    | 40  | 13 | 0.955  |
| alder-straw     | ko00330 | Arginine and proline metabolism             | 38  | 17 | 0.9466 |
| alder-straw     | ko00906 | Carotenoid biosynthesis                     | 4   | 4  | 0.9202 |
| alder-straw     | ko00600 | Sphingolipid metabolism                     | 21  | 11 | 0.8762 |
| alder-straw     | ko00910 | Nitrogen metabolism                         | 21  | 6  | 0.8466 |
| alder-straw     | ko00780 | Biotin metabolism                           | 9   | 5  | 0.7978 |
| alder-straw     | ko00740 | Riboflavin metabolism                       | 11  | 5  | 0.7602 |
| alder-straw     | ko04978 | Mineral absorption                          | 7   | 4  | 0.727  |
| alder-straw     | ko00380 | Tryptophan metabolism                       | 40  | 21 | 0.702  |
| alder-straw     | ko05130 | Pathogenic Escherichia coli infection       | 13  | 5  | 0.6742 |
| alder-straw     | ko00640 | Propanoate metabolism                       | 28  | 13 | 0.6634 |
| solid-liquidExp | ko00970 | Aminoacyl-tRNA biosynthesis                 | 40  | 28 | 0.9998 |
| solid-liquidExp | ko01230 | Biosynthesis of amino acids                 | 116 | 58 | 0.9152 |
| solid-liquidExp | ko00520 | Amino sugar and nucleotide sugar metabolism | 49  | 28 | 0.8352 |
| solid-          | ko03030 | DNA replication                             | 32  | 27 | 0.7924 |

|                 |         |                                            |    |    |        |
|-----------------|---------|--------------------------------------------|----|----|--------|
| liquidExp       |         |                                            |    |    |        |
| solid-liquidExp | ko03008 | Ribosome biogenesis in eukaryotes          | 64 | 31 | 0.7612 |
| solid-liquidExp | ko00280 | Valine, leucine and isoleucine degradation | 49 | 26 | 0.7048 |
| solid-liquidExp | ko04111 | Cell cycle - yeast                         | 75 | 43 | 0.6586 |
| solid-liquidExp | ko01524 | Platinum drug resistance                   | 29 | 18 | 0.6358 |
| solid-liquidExp | ko03050 | Proteasome                                 | 35 | 18 | 0.6236 |
| solid-liquidSta | ko03008 | Ribosome biogenesis in eukaryotes          | 64 | 38 | 1      |
| solid-liquidSta | ko00500 | Starch and sucrose metabolism              | 65 | 38 | 0.997  |
| solid-liquidSta | ko00040 | Pentose and glucuronate interconversions   | 35 | 25 | 0.9964 |
| solid-liquidSta | ko03030 | DNA replication                            | 32 | 22 | 0.983  |
| solid-liquidSta | ko00970 | Aminoacyl-tRNA biosynthesis                | 40 | 22 | 0.9042 |
| solid-liquidSta | ko00052 | Galactose metabolism                       | 30 | 20 | 0.882  |
| solid-liquidSta | ko00564 | Glycerophospholipid metabolism             | 39 | 22 | 0.8494 |
| solid-          | ko00770 | Pantothenate and CoA biosynthesis          | 23 | 15 | 0.7834 |

|                 |         |                                              |     |    |        |
|-----------------|---------|----------------------------------------------|-----|----|--------|
| liquidSta       |         |                                              |     |    |        |
| solid-liquidSta | ko00965 | Betalain biosynthesis                        | 17  | 12 | 0.6102 |
| stat-exp        | ko00040 | Pentose and glucuronate interconversions     | 35  | 21 | 1      |
| stat-exp        | ko03010 | Ribosome                                     | 99  | 29 | 1      |
| stat-exp        | ko01120 | Microbial metabolism in diverse environments | 246 | 60 | 0.9772 |
| stat-exp        | ko00280 | Valine, leucine and isoleucine degradation   | 49  | 17 | 0.9676 |
| stat-exp        | ko00520 | Amino sugar and nucleotide sugar metabolism  | 49  | 12 | 0.8906 |
| stat-exp        | ko00620 | Pyruvate metabolism                          | 41  | 11 | 0.8554 |
| stat-exp        | ko00260 | Glycine, serine and threonine metabolism     | 47  | 11 | 0.845  |
| stat-exp        | ko00250 | Alanine, aspartate and glutamate metabolism  | 31  | 9  | 0.7604 |
| stat-exp        | ko01110 | Biosynthesis of secondary metabolites        | 355 | 94 | 0.7382 |
| straw-malt      | ko00500 | Starch and sucrose metabolism                | 65  | 31 | 1      |
| straw-malt      | ko00040 | Pentose and glucuronate interconversions     | 35  | 19 | 1      |
| straw-malt      | ko03008 | Ribosome biogenesis in eukaryotes            | 64  | 23 | 1      |
| straw-malt      | ko00330 | Arginine and proline metabolism              | 38  | 18 | 0.9978 |
| straw-malt      | ko00520 | Amino sugar and nucleotide sugar metabolism  | 49  | 17 | 0.967  |
| straw-malt      | ko00980 | Metabolism of xenobiotics by cytochrome P450 | 28  | 14 | 0.9512 |
| straw-malt      | ko00630 | Glyoxylate and dicarboxylate metabolism      | 40  | 21 | 0.9136 |
| straw-malt      | ko00920 | Sulfur metabolism                            | 17  | 8  | 0.9056 |

|            |         |                                   |    |    |        |
|------------|---------|-----------------------------------|----|----|--------|
| straw-malt | ko00052 | Galactose metabolism              | 30 | 15 | 0.897  |
| straw-malt | ko00350 | Tyrosine metabolism               | 50 | 20 | 0.838  |
| straw-malt | ko00770 | Pantothenate and CoA biosynthesis | 23 | 11 | 0.7994 |
| straw-malt | ko00910 | Nitrogen metabolism               | 21 | 9  | 0.6518 |
| straw-malt | ko01220 | Degradation of aromatic compounds | 32 | 17 | 0.6144 |

## Supplemental Table S4

| condition   | GO ID      | GO name                        | genes with this annotation in the genome | differentially expressed genes with this annotation | activation probability |
|-------------|------------|--------------------------------|------------------------------------------|-----------------------------------------------------|------------------------|
| alder-malt  | GO:0016491 | oxidoreductase activity        | 506                                      | 205                                                 | 1                      |
| alder-malt  | GO:0005975 | carbohydrate metabolic process | 226                                      | 72                                                  | 1                      |
| alder-malt  | GO:0071949 | FAD binding                    | 55                                       | 29                                                  | 1                      |
| alder-malt  | GO:0055085 | transmembrane transport        | 513                                      | 165                                                 | 1                      |
| alder-malt  | GO:0055114 | oxidation-reduction process    | 768                                      | 283                                                 | 1                      |
| alder-malt  | GO:0008152 | metabolic process              | 387                                      | 158                                                 | 1                      |
| alder-malt  | GO:0008080 | N-acetyltransferase activity   | 49                                       | 19                                                  | 0.9998                 |
| alder-malt  | GO:0006508 | proteolysis                    | 132                                      | 39                                                  | 0.7976                 |
| alder-straw | GO:0016491 | oxidoreductase activity        | 506                                      | 211                                                 | 1                      |
| alder-straw | GO:0003824 | catalytic activity             | 610                                      | 212                                                 | 1                      |
| alder-straw | GO:0016787 | hydrolase activity             | 165                                      | 57                                                  | 1                      |

|                 |            |                                |     |     |        |
|-----------------|------------|--------------------------------|-----|-----|--------|
| alder-straw     | GO:0071949 | FAD binding                    | 55  | 28  | 1      |
| alder-straw     | GO:0006508 | proteolysis                    | 132 | 53  | 1      |
| alder-straw     | GO:0055114 | oxidation-reduction process    | 768 | 301 | 1      |
| alder-straw     | GO:0055085 | transmembrane transport        | 513 | 176 | 0.9952 |
| alder-straw     | GO:0005975 | carbohydrate metabolic process | 226 | 110 | 0.988  |
| solid-liquidExp | GO:0005524 | ATP binding                    | 497 | 231 | 1      |
| solid-liquidExp | GO:0005515 | protein binding                | 749 | 314 | 1      |
| solid-liquidExp | GO:0003824 | catalytic activity             | 610 | 256 | 1      |
| solid-liquidExp | GO:0055085 | transmembrane transport        | 513 | 230 | 1      |
| solid-liquidExp | GO:0055114 | oxidation-reduction process    | 768 | 341 | 0.9992 |
| solid-liquidExp | GO:0006508 | proteolysis                    | 132 | 68  | 0.9848 |
| solid-liquidExp | GO:0005975 | carbohydrate metabolic process | 226 | 115 | 0.9762 |
| solid-liquidExp | GO:0005634 | nucleus                        | 389 | 180 | 0.9716 |
| solid-liquidExp | GO:0016787 | hydrolase activity             | 165 | 77  | 0.913  |
| solid-liquidExp | GO:0016491 | oxidoreductase activity        | 506 | 231 | 0.8836 |

|                 |            |                                |     |     |        |
|-----------------|------------|--------------------------------|-----|-----|--------|
| solid-liquidExp | GO:0003676 | nucleic acid binding           | 294 | 130 | 0.6472 |
| solid-liquidSta | GO:0003824 | catalytic activity             | 610 | 283 | 1      |
| solid-liquidSta | GO:0005975 | carbohydrate metabolic process | 226 | 125 | 0.9898 |
| solid-liquidSta | GO:0055114 | oxidation-reduction process    | 768 | 335 | 0.9868 |
| solid-liquidSta | GO:0008152 | metabolic process              | 387 | 180 | 0.9798 |
| solid-liquidSta | GO:0055085 | transmembrane transport        | 513 | 264 | 0.975  |
| solid-liquidSta | GO:0006508 | proteolysis                    | 132 | 66  | 0.8306 |
| stat-exp        | GO:0003824 | catalytic activity             | 610 | 164 | 1      |
| stat-exp        | GO:0055114 | oxidation-reduction process    | 768 | 232 | 1      |
| stat-exp        | GO:0016491 | oxidoreductase activity        | 506 | 153 | 0.9988 |
| stat-exp        | GO:0071949 | FAD binding                    | 55  | 21  | 0.9874 |
| stat-exp        | GO:0005975 | carbohydrate metabolic process | 226 | 67  | 0.9518 |
| stat-exp        | GO:0055085 | transmembrane transport        | 513 | 113 | 0.8948 |
| straw-malt      | GO:0008080 | N-acetyltransferase activity   | 49  | 22  | 1      |
| straw-malt      | GO:0016491 | oxidoreductase activity        | 506 | 192 | 1      |
| straw-malt      | GO:0005975 | carbohydrate metabolic process | 226 | 117 | 1      |

|            |            |                                                                                   |     |     |        |
|------------|------------|-----------------------------------------------------------------------------------|-----|-----|--------|
| straw-malt | GO:0003824 | catalytic activity                                                                | 610 | 198 | 1      |
| straw-malt | GO:0016787 | hydrolase activity                                                                | 165 | 54  | 1      |
| straw-malt | GO:0071949 | FAD binding                                                                       | 55  | 31  | 1      |
| straw-malt | GO:0006508 | proteolysis                                                                       | 132 | 53  | 1      |
| straw-malt | GO:0055085 | transmembrane transport                                                           | 513 | 188 | 1      |
| straw-malt | GO:0055114 | oxidation-reduction process                                                       | 768 | 279 | 1      |
| straw-malt | GO:0000981 | RNA polymerase II transcription factor activity,<br>sequence-specific DNA binding | 217 | 66  | 0.9982 |
| straw-malt | GO:0042254 | ribosome biogenesis                                                               | 15  | 9   | 0.634  |
